# Supplementary material for: Drug repurposing for neuroregeneration in multiple sclerosis
Source: PubMed Central journal article supplement — Neural Regen Res. 2018 Aug;13(8):1366–7. doi: 10.4103/1673-5374.235242 (PMC6108191; doi:10.4103/1673-5374.235242), 2018-08
Supplement: NRR-13-1366_Suppl2.pdf [file NRR-13-1366_Suppl2.pdf]

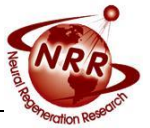

## PEER-REVIEW REPORT 2

**Name of journal:** Neural Regeneration Research

**Manuscript NO:** NRR-D-18-00287

**Title:** Drug repurposing for neuroregeneration in multiple sclerosis

**Reviewer's Name:** Anna Maria Colangelo

**Reviewer's country:** Italy

**Date sent for review:** 2018-05-09

**Date reviewed:** 2018-05-22

**Review time:** 13 Days

Your peer review comments will be published as an open peer review report. Do you agree to have your name included with the published article?

Yes

### COMMENTS TO AUTHORS

The topic of this perspective article is of interest for the scientific community working in this field. It is presented in a clear and concise form.

The question of myelin repair in Multiple Sclerosis is a hot topic for the scientific community working in this field, and even more for patients who experience motor disability and fatigue.

The perspective of revisiting some drugs that might have an effect on myelin repair, in addition to their immunomodulatory activity, is an avenue that is worth to take.
